# Supplementary material for: Impact of CKD Progression on Cardiovascular Disease Risk in a Contemporary UK Cohort of Individuals With Diabetes
Source: PubMed Central journal article supplement — Kidney Int Rep. 2020 Aug 7;5(10):1651–60. doi: 10.1016/j.ekir.2020.07.029 (PMC7569691; doi:10.1016/j.ekir.2020.07.029), 2020-08-07
Supplement: mmc1.pdf [file mmc1.pdf]

**Supplemental Table 1. Baseline characteristics among UK adults with type 2 diabetes mellitus from 01 Jan 2005 to 31 Dec 2015 by cardiovascular disease.**

| Baseline characteristics in UK Diabetics |           | Total T2DM Subjects | Incident Heart Failure |               | Incident Myocardial Infarction |                | Incident Ischemic Stroke |              | Incident MACE+ |               |
|------------------------------------------|-----------|---------------------|------------------------|---------------|--------------------------------|----------------|--------------------------|--------------|----------------|---------------|
|                                          |           |                     | No                     | Yes           | No                             | Yes            | No                       | Yes          | No             | Yes           |
| N (%*)                                   |           | 110 836             | 104 696                | 6 140 (5.5)   | 108 116                        | 2 720 (2.5)    | 109 630                  | 1 206 (1.1)  | 101 608        | 9 228 (8.3)   |
| Age (years)                              | Mean (SD) | 63.4 (14.8)         | 62.93 (14.9)           | 71.43 (10.3)  | 63.26 (14.8)                   | 68.97 (12.0)   | 63.33 (14.8)             | 69.55 (11.2) | 62.76 (14.9)   | 70.48 (11.0)  |
| Gender Male                              | n (%)     | 57 777 (52)         | 54 258 (52)            | 3 519 (57)    | 56 093 (52)                    | 1 684 (62)     | 57 105 (52)              | 672 (56)     | 52 393 (52)    | 5 384 (58)    |
| Smoker (Yes)                             | n (%)     | 16 589 (15)         | 15 697 (15)            | 892 (15)      | 16 083 (15)                    | 506 (19)       | 16 386 (15)              | 203 (17)     | 15 136 (15)    | 1 453 (16)    |
| SBP(mm Hg)                               | Mean (SD) | 140.05 (15.9)       | 139.9 (15.8)           | 142.44 (16.8) | 139.97 (15.8)                  | 142.74 (16.8)  | 140 (15.9)               | 144.1 (16.8) | 139.8 (15.8)   | 142.64 (16.8) |
| DBP(mm Hg)                               | Mean (SD) | 78.99 (8.8)         | 79.12 (8.8)            | 76.91 (8.8)   | 79.02 (8.8)                    | 77.89 (9.2)    | 78.99 (8.8)              | 78.65 (9.2)  | 79.14 (8.8)    | 77.42 (9.0)   |
| LDL (mmol/L)                             | Mean (SD) | 101.55 (33.8)       | 101.93 (33.8)          | 95.49 (32.5)  | 101.53 (33.7)                  | 102.34 (35.3)  | 101.57 (33.8)            | 99.61 (33.6) | 101.92 (33.8)  | 97.62 (33.4)  |
| TG(mmol/L)                               | Mean (SD) | 173.49 (99.2)       | 173.57 (99.4)          | 172.18 (96.5) | 173.36 (99.1)                  | 178.53 (103.4) | 173.51 (99.2)            | 171.55 (96)  | 173.43 (99.2)  | 174.14 (98.9) |
| BMI (kg/m2)                              | Mean (SD) | 30.47 (6.2)         | 30.45 (6.2)            | 30.74 (6.1)   | 30.49 (6.2)                    | 29.8 (5.7)     | 30.48 (6.2)              | 29.74 (5.8)  | 30.47 (6.2)    | 30.41 (6)     |
| Follow-up years                          | Mean (SD) | 7.07 (3.7)          | 7.06 (3.7)             | 7.19 (3.4)    | 7.08 (3.7)                     | 6.58 (3.6)     | 7.06 (3.7)               | 8.02 (3)     | 7.07 (3.7)     | 7.13 (3.4)    |
|                                          | Median    | 8.04                | 8.06                   | 7.87          | 8.07                           | 6.84           | 8.04                     | 8.77         | 8.06           | 7.87          |
| Diabetes Mellitus II Duration (yrs)      | Mean (SD) | 4.22 (3)            | 4.19 (3.0)             | 4.87 (3.1)    | 4.21 (3.0)                     | 4.85 (3.1)     | 4.22 (3)                 | 4.53 (3)     | 4.17 (3.0)     | 4.8 (3.1)     |
|                                          | Median    | 3.58                | 3.53                   | 4.42          | 3.56                           | 4.38           | 3.57                     | 3.97         | 3.51           | 4.32          |
| T2DM >= 5 yrs                            | n (%)     | 39 682 (35.8)       | 36 933 (35.3)          | 2 749 (44.8)  | 38 477 (35.6)                  | 1 205 (44.3)   | 39 187 (35.7)            | 495 (41)     | 35 638 (35.1)  | 4 044 (43.8)  |

**Supplemental Table 2. Proportional hazards regression models in 30 222 adults with T2DM and CKD estimating time to CVD outcomes by eGFR measures**

Adjusted Cardiovascular Outcomes [HR and 95% CI]

| eGFR Variable                                                 | Heart Failure<br>(n=1185)    | Myocardial<br>Infarction (n=311) | Ischaemic Stroke<br>(n=195)  | MACE + (n=1588)              |
|---------------------------------------------------------------|------------------------------|----------------------------------|------------------------------|------------------------------|
| <b>Updated Mean<br/>Categorical*</b>                          |                              |                                  |                              |                              |
| Mean eGFR $\geq 30$ to 60                                     | <b>1.71</b><br>(1.43 - 2.05) | <b>1.71</b><br>(1.43 - 2.05)     | <b>1.61</b><br>(1.04 - 2.49) | <b>1.63</b><br>(1.40 - 1.91) |
| Mean eGFR < 30                                                | <b>2.34</b><br>(1.86 - 2.94) | <b>2.34</b><br>(1.86 - 2.94)     | <b>2.72</b><br>(1.58 - 4.68) | <b>2.33</b><br>(1.92 - 2.84) |
| <b>eGFR Updated Slope<br/>Continuous</b>                      | 0.99<br>(0.99 - 1.00)        | 0.99<br>(0.99 - 1.00)            | 0.99<br>(0.98 - 1.01)        | 0.99<br>(0.99 - 1.00)        |
| <b>Updated eGFR Slope<br/>Categorical<math>\square</math></b> |                              |                                  |                              |                              |
| Latest Updated Slope<br>0 to 3                                | 1.02<br>(0.85 - 1.23)        | 1.10<br>(0.78 - 1.57)            | 1.19<br>(0.76 - 1.85)        | 1.06<br>(0.90 - 1.24)        |
| Latest Updated Slope<br>-3 to < 0                             | <b>1.23</b><br>(1.03 - 1.47) | 1.16<br>(0.83 - 1.63)            | 1.32<br>(0.86 - 2.01)        | <b>1.22</b><br>(1.05 - 1.42) |
| Latest Updated Slope <<br>-3                                  | <b>1.48</b><br>(1.27 - 1.76) | <b>1.39</b><br>(1.01 - 1.91)     | 1.33<br>(0.88 - 2.01)        | <b>1.45</b><br>(1.26 - 1.67) |
| <b>Updated Mean and<br/>Slope**</b>                           |                              |                                  |                              |                              |
| Updated Mean eGFR<br>$\geq 30$ to 60                          | <b>1.67</b><br>(1.39 - 2.00) | <b>1.41</b><br>(1.01 - 1.96)     | <b>1.57</b><br>(1.02 - 2.44) | <b>1.59</b><br>(1.37 - 1.86) |
| Updated Mean eGFR <<br>30                                     | <b>2.24</b><br>(1.78 - 2.83) | <b>2.25</b><br>(1.47 - 3.45)     | <b>2.62</b><br>(1.51 - 4.53) | <b>2.24</b><br>(1.84 - 2.74) |
| Updated eGFR Slope<br>0 to 3                                  | 0.95<br>(0.79 - 1.15)        | 1.03<br>(0.72 - 1.47)            | 1.09<br>(0.70 - 1.71)        | 0.98<br>(0.84 - 1.15)        |
| Updated eGFR Slope<br>-3 to < 0                               | 1.12<br>(0.94 - 1.34)        | 1.05<br>(0.75 - 1.49)            | 1.18<br>(0.77 - 1.81)        | 1.11<br>(0.95 - 1.29)        |
| Updated eGFR Slope <<br>-3                                    | <b>1.38</b><br>(1.17 - 1.63) | 1.28<br>(0.93 - 1.76)            | 1.22<br>(0.80 - 1.85)        | <b>1.34</b><br>(1.16 - 1.54) |

HR estimates for CKD variables and 95% confidence intervals are based on the linear effect model per mean or slope and categorized eGFR slope variables. Fully adjusted models include the following baseline variables: age, sex, BMI, SBP, DBP, smoking, LDL, Triglycerides, Diabetes duration, RAAS, MRA, and Hyperkalemia. Reference categories include: \*eGFR updated mean category  $\geq 60$  ml/L and  $\square$  Updated latest slope  $\geq 3$  are the reference categories. \*\*Both updated mean and updated slope were assessed in the same model; interaction effects were non-significant for all events analyzed, results not shown.
